# Supplementary material
Source: publisher figshare collection journal article supplement (https://asha.figshare.com/articles/dataset/_/14825454)
Supplement: Supplementary file 1 [file 1]

## **Supplemental Material S2.** Linear mixed-effects model on decline in speech perception.

$$\text{WRCM}_{ij} = \beta_0 + \beta_1 \text{age}_{ij} + \beta_2 \text{agegroup}_i + \beta_3 \text{occupation}_i + \beta_4 \text{musicianship}_i + \beta_5 \text{musicianship}_i * \text{age}_{ij} + \beta_6 \text{CV}_i + U_{0i} + e_{ij}$$

- $\text{WRCM}_{ij}$  is the word recognition in competing message performance [% correct] of  $i$ th participant at  $j$ th occasion
- $\text{age}_{ij}$  is the age (centered with baseline mean) of  $i$ th participant at  $j$ th occasion
- $\text{agegroup}_i$  is the age group of  $i$ th participant at baseline (groups: 40-59; 60-69; 70+ years)
- $\text{occupation}_i$  is the education of the  $i$ th participant at baseline
- $\text{musicianship}_i$  is the musicianship status of  $i$ th participant at baseline
- $\text{CV}_i$  is the vector of covariates at baseline of  $i$ th participant
- $U_{0i}$  is the random intercept
- $e_{ij}$  is the residual
