# Supplementary material
Source: publisher figshare collection journal article supplement (https://asha.figshare.com/articles/dataset/_/14825454)
Supplement: Supplementary file 2 [file 1]

**Supplemental Material S6.** Baseline characteristics of participants included in the analytic dataset and the EHLS cohort.

|                                             | Analytic dataset | EHLS cohort |
|---------------------------------------------|------------------|-------------|
| <i>N</i>                                    | 2938             | 3760        |
| Age, years, <i>M</i> ( <i>SD</i> )          | 63.7(9.6)        | 65.8(10.6)  |
| Women, <i>n</i> (%)                         | 1719(58.5)       | 2191(57.7)  |
| Musician, <i>n</i> (%)                      | 630(21.4)        | 766(20.4)   |
| Occupation – longest held job, <i>n</i> (%) |                  |             |
| Managerial or professional                  | 576(19.6)        | 669(17.6)   |
| Technical sales                             | 708(24.1)        | 859(22.6)   |
| Service                                     | 576(19.6)        | 761(20.0)   |
| Farming or forestry                         | 93(3.2)          | 132(3.5)    |
| Production                                  | 308(10.5)        | 425(11.2)   |
| Operator or fabricator                      | 552(18.8)        | 758(20.0)   |
| Education, <i>n</i> (%)                     |                  |             |
| 16 years or more                            | 481(16.4)        | 546(14.4)   |
| 13-15 years                                 | 478(16.3)        | 577(15.2)   |
| 12 years                                    | 1388(47.2)       | 1714(45.1)  |
| 0-11 years                                  | 569(19.4)        | 914(24.1)   |

*Note.* EHLS = Epidemiology of Hearing Loss Study; *M* = mean; *SD* = standard deviation.
