# Supplementary material
Source: publisher figshare collection journal article supplement (https://asha.figshare.com/articles/dataset/_/14825454)
Supplement: Supplementary file 4 [file 1]

**Supplemental Material S1.** Correlations between cognitive scores at Epidemiology of Hearing Loss Study 4.

|             | <b>TMTA</b> | <b>TMTB</b> | <b>DSST</b> | <b>AVLT</b> | <b>VFT</b> | <b>MMSE</b> |
|-------------|-------------|-------------|-------------|-------------|------------|-------------|
| <b>TMTA</b> | -           | -           | -           | -           | -          | -           |
| <b>TMTB</b> | .65         | -           | -           | -           | -          | -           |
| <b>DSST</b> | .66         | .67         | -           | -           | -          | -           |
| <b>AVLT</b> | .36         | .42         | .48         | -           | -          | -           |
| <b>VFT</b>  | .36         | .41         | .46         | .36         | -          | -           |
| <b>MMSE</b> | .61         | .50         | .53         | .46         | .38        | -           |

*Note.* TMT = Trail-making Test; DSST = Digit Symbol Substitution Test; AVLT = Auditory Verbal Learning Test; VFT = Verbal Fluency Test; MMSE = Mini-Mental-State Examination. Pearson correlations, TMTA and TMTB were reversed so that higher values reflect better performance for all scores. All  $p < .0001$ .
