# Supplementary material
Source: publisher figshare collection journal article supplement (https://asha.figshare.com/articles/dataset/_/14825454)

**Supplemental Material S5.** Survival plot for the onset of cognitive impairment stratified by musicianship in men.

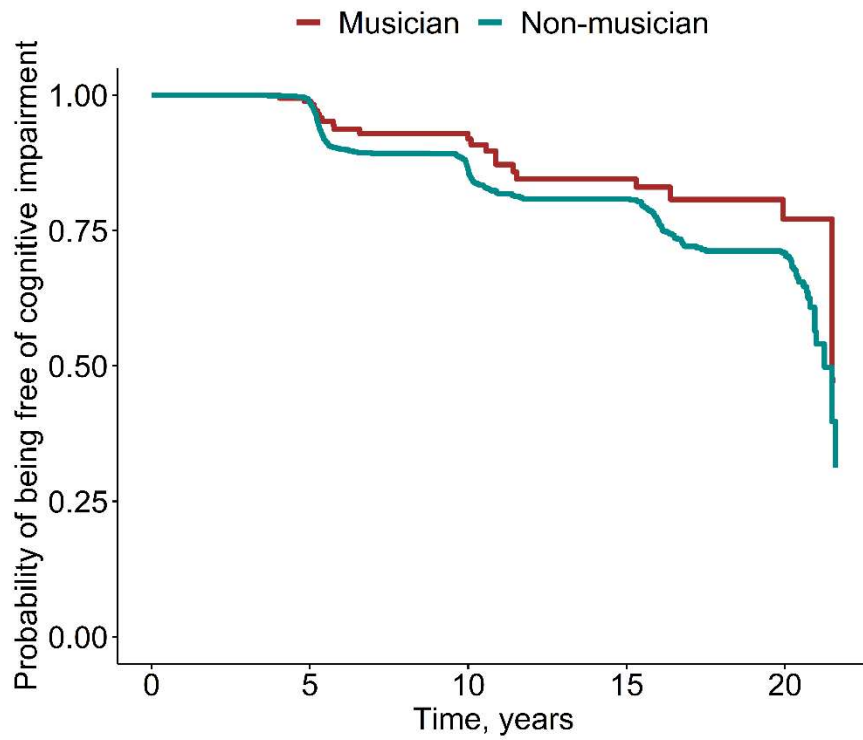

Supplement: Supplementary file 6 [file 1]
